# Supplementary material for: One-step and template-free preparation of hierarchical porous carbons with high capacitive performance
Source: Royal Society of Chemistry journal article supplement (doi:10.1039/c5ra07807e), 2015-01-01
Supplement: c5ra07807e1.pdf [file c5ra07807e1.pdf]

## Supporting Information

### One-step and template-free preparation of hierarchical porous carbons with high capacitive performance

Jin Zhou\*, Zhongshen Zhang, Zhaohui Li, Tingting Zhu, and Shuping Zhuo\*

School of Chemical Engineering, Shandong University of Technology, Zibo 255049,

P. R. China. Tel. /fax: +86 533 2781664

#### Table of Contents

**Fig. S1** Photographic pictures of the hydrogel and xerogel

**Fig. S2** SEM images (a, b) HPC-6, (c) HPC-7, (d) HPC-8, (e, f, g) HPC-9 and (h) HPC-10

**Fig. S3** TEM images (a) HPC-6, (b) HPC-7, (c) HPC-8, (d) HPC-9 and (e, f) HPC-10

**Fig. S4** Porosity analysis of HPC-x (a) nitrogen sorption isotherms, (b, c) NLDFT pore size distribution calculated from N<sub>2</sub> adsorption isotherms, (d) NLDFT micropore size distribution calculated from CO<sub>2</sub> adsorption isotherms

**Fig. S5** (a) N<sub>2</sub> sorption isotherms and (b) pore size distribution of direct-dried xerogels

**Fig. S6** (a) N<sub>2</sub> sorption isotherms and (b) pore size distributions of HPC carbon prepared at 900°C

**Fig. S7** (a) Galvanostatic charge/discharge curves at different current density, (b) volumetric capacitance of HPC-9d and CMK-3 in KOH and organic electrolytes

**Fig. S8** Specific capacitances of HPC carbon prepared at 900 °C in KOH electrolyte

**Fig. S9** normalized imaginary capacitance vs. alternative current frequency

**Fig. S10** (a) CV curves of HPC-9d at different scan rate and (b) galvanostatic charge/discharge curves of HPC-9d at different current density in TEABF<sub>4</sub>/AN electrolyte

**Table S1** Texture properties of samples

**Table S2** Values of I<sub>D</sub>/I<sub>G</sub> for the prepared carbon materials in this work

**Table S3** Specific capacitance at 0.20 A g<sup>-1</sup> and the time constant in KOH electrolyte

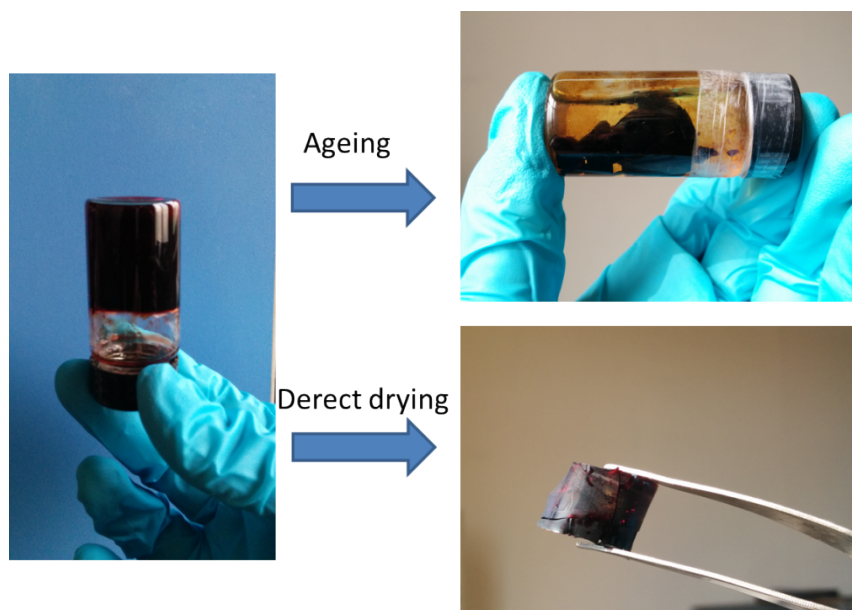

**Fig. S1** Photographic pictures of the hydrogel and xerogel

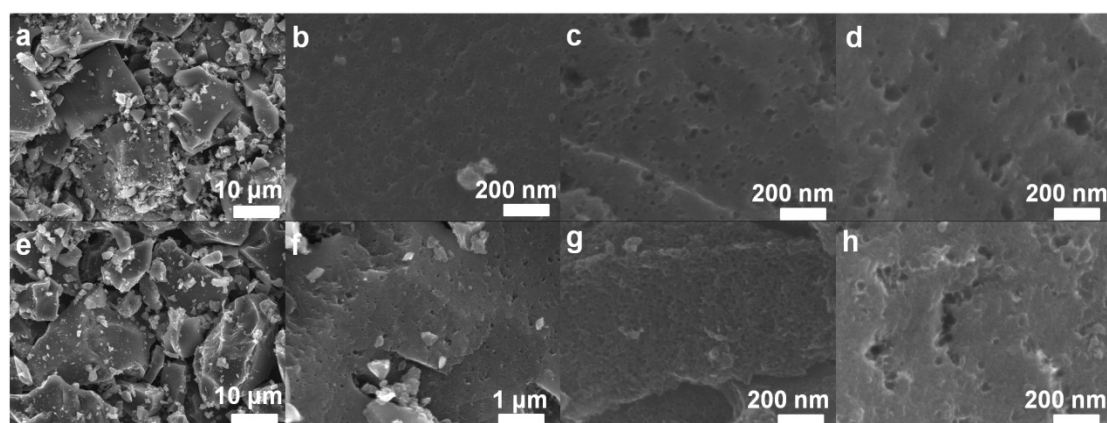

**Fig. S2** SEM images (a, b) HPC-6, (c) HPC-7, (d) HPC-8, (e, f, g) HPC-9 and (h) HPC-10

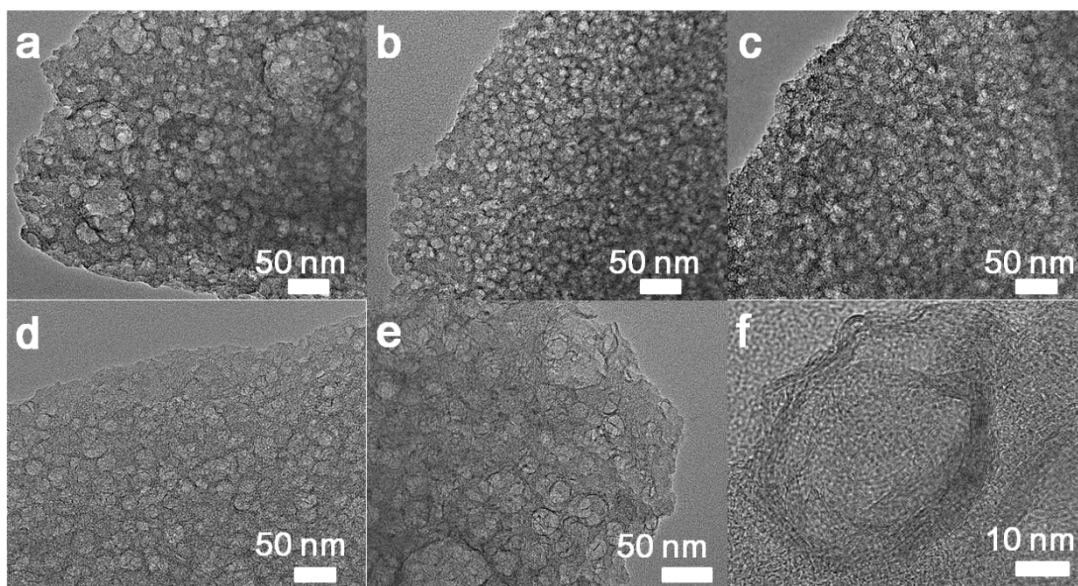

**Fig. S3** TEM images (a) HPC-6, (b) HPC-7, (c) HPC-8, (d) HPC-9 and (e, f) HPC-10

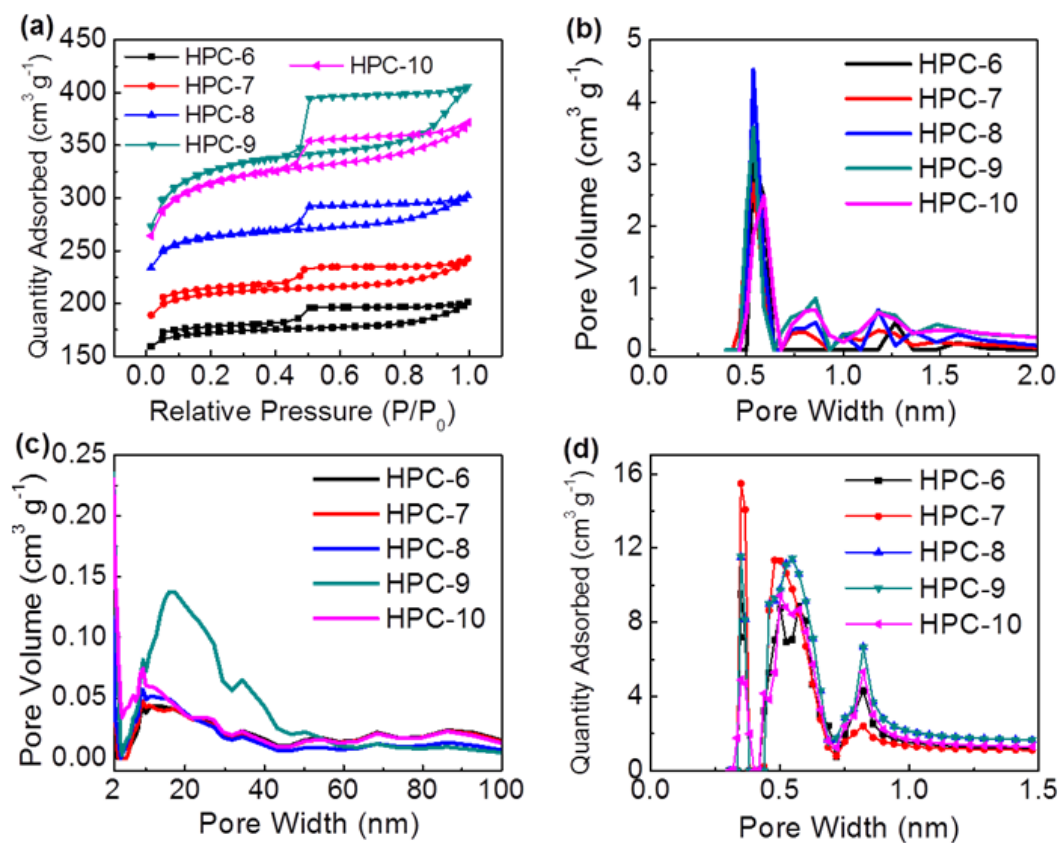

**Fig. S4** Porosity analysis of HPC-*x* (a) nitrogen sorption isotherms, (b, c) NLDFT pore size distribution calculated from  $N_2$  adsorption isotherms, (d) NLDFT micropore size distribution calculated from  $CO_2$  adsorption isotherms

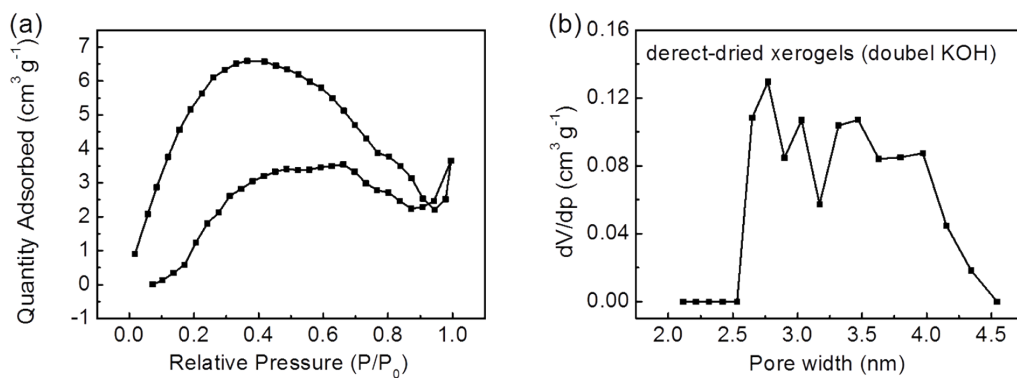

**Fig. S5** (a)  $\text{N}_2$  sorption isotherms and (b) pore size distribution of direct-dried xerogels

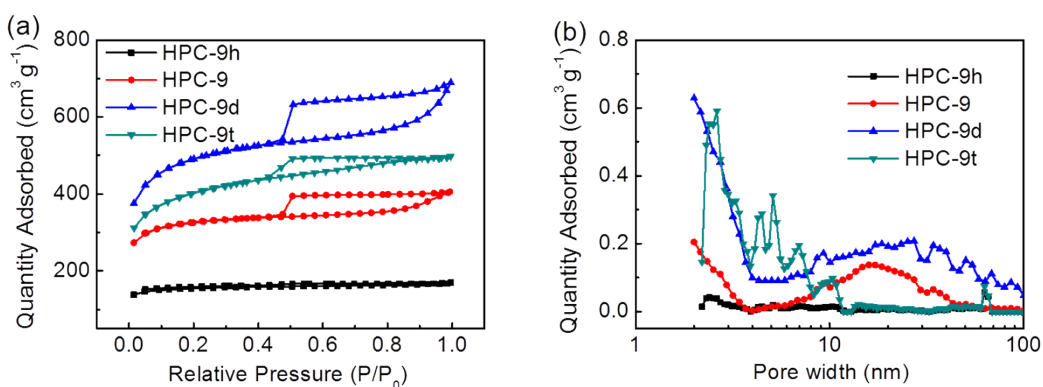

**Fig. S6** (a)  $\text{N}_2$  sorption isotherms and (b) pore size distributions of HPC carbon prepared at  $900^\circ\text{C}$

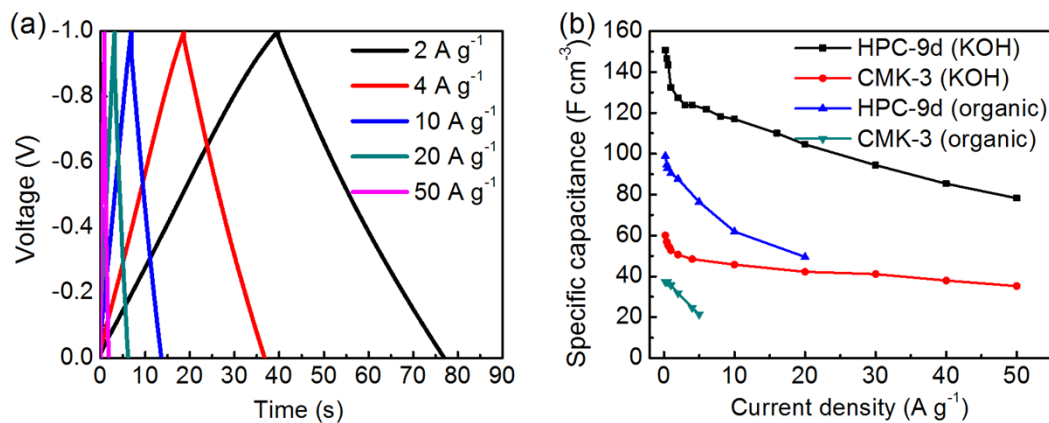

**Fig. S7** (a) Galvanostatic charge/discharge curves at different current density, (b) volumetric capacitance of HPC-9d and CMK-3 in KOH and organic electrolytes

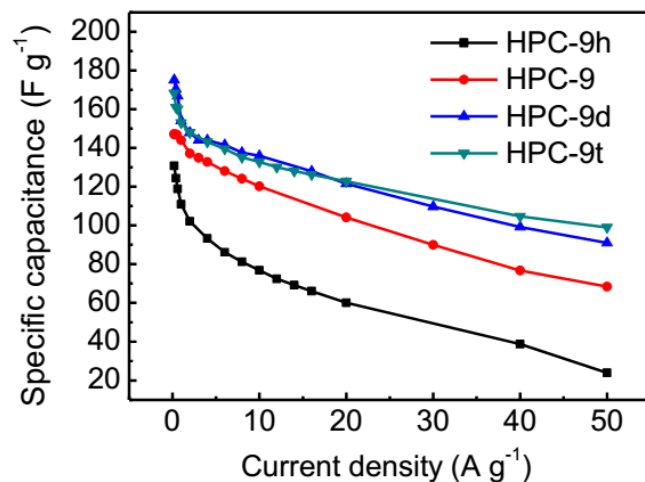

**Fig. S8** Specific capacitances of HPC carbon prepared at 900 °C in KOH electrolyte

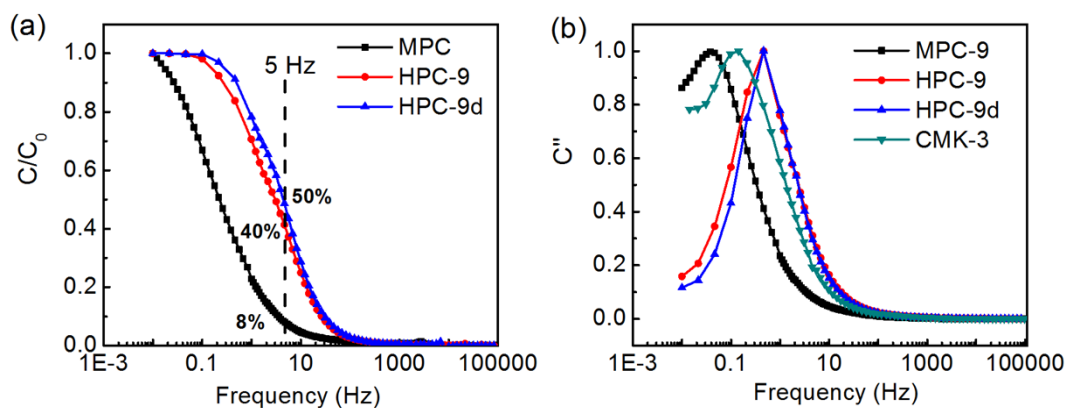

**Fig. S9** normalized imaginary capacitance vs. alternative current frequency

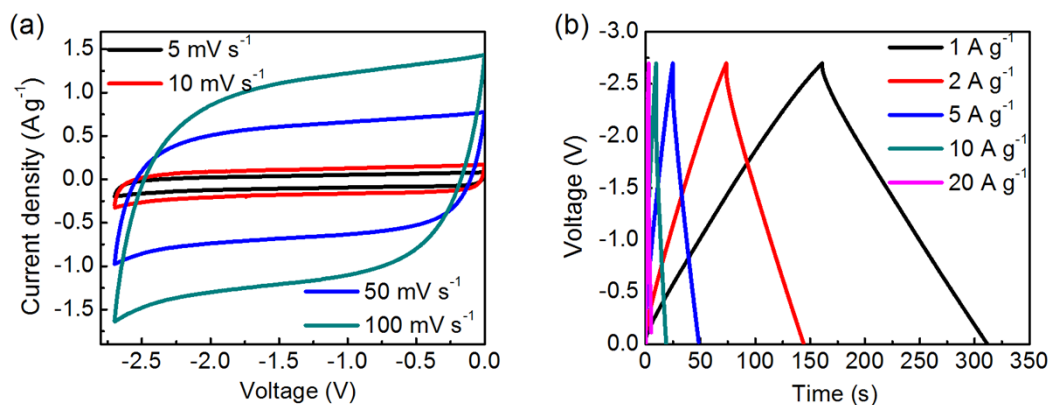

**Fig. S10** (a) CV curves of HPC-9d at different scan rate and (b) galvanostatic charge/discharge curves of HPC-9d at different current density in TEABF<sub>4</sub>/AN electrolyte

**Table S1** Texture properties of samples

| Sample | $S_{\text{BET}}$<br>( $\text{m}^2 \text{g}^{-1}$ ) | $V_{\text{T}}$<br>( $\text{cm}^3 \text{g}^{-1}$ ) | $V_{\text{meso}}$<br>( $\text{cm}^3 \text{g}^{-1}$ ) | $V_{\text{micro}}$<br>( $\text{cm}^3 \text{g}^{-1}$ ) |
|--------|----------------------------------------------------|---------------------------------------------------|------------------------------------------------------|-------------------------------------------------------|
| HPC-9h | 473                                                | 0.26                                              | 0.04                                                 | 0.22                                                  |
| HPC-9  | 1007                                               | 0.62                                              | 0.16                                                 | 0.46                                                  |
| HPC-9d | 1549                                               | 0.81                                              | 0.17                                                 | 0.61                                                  |
| HPC-9t | 1387                                               | 0.77                                              | 0.29                                                 | 0.48                                                  |

**Table S2** Values of  $I_{\text{D}}/I_{\text{G}}$  for the prepared carbon materials in this work

| Sample                      | HPC-6 | HPC-7 | HPC-8 | HPC-9 | HPC-10 | HPC-9d | MPC-9 |
|-----------------------------|-------|-------|-------|-------|--------|--------|-------|
| $I_{\text{D}}/I_{\text{G}}$ | 0.80  | 0.82  | 0.84  | 0.85  | 0.85   | 0.86   | 0.83  |

**Table S3** Specific capacitance at  $0.20 \text{ A g}^{-1}$  and the time constant in KOH electrolyte

| Samples | $C_{\text{KOH}}$ ( $\text{F g}^{-1}$ ) | $C_{\text{Organic}}$ ( $\text{F g}^{-1}$ ) | $\tau$ |
|---------|----------------------------------------|--------------------------------------------|--------|
| MPC-9   | 174.4                                  | 1.9                                        | 3.95   |
| HPC-9   | 147.2                                  | 38.0                                       | 0.36   |
| HPC-9d  | 175.2                                  | 115.0                                      | 0.33   |
| CMK-3   | 126.6                                  | 78.6                                       | 1.17   |
